# Supplementary material for: Mitigating Postfrying Degradation Factors of Fats and Oils through the Development of Bagasse-Based Adsorbent
Source: Hindawi journal article supplement (doi:10.1155/2023/8392674), 2023-12-21
Supplement: f1 [file 8392674.f1.docx]

**Supplementary Material**


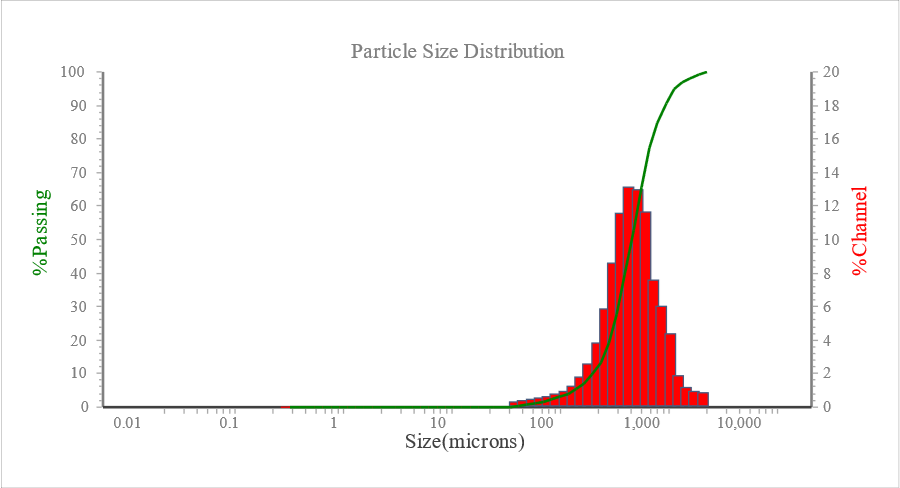


### S Fig 1. Particle size distribution of control SCB precursor represented in microns (µm)


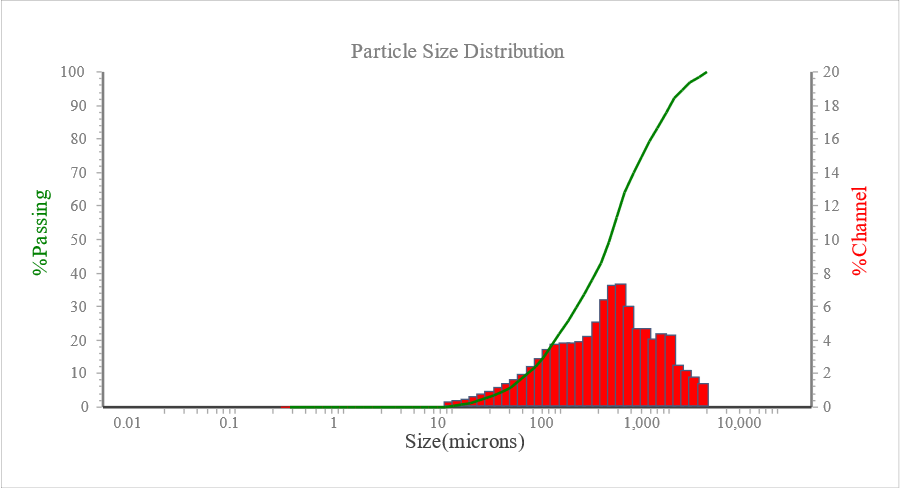


### S Fig 2. Particle size distribution of SCB 0.5% represented in microns (µm)


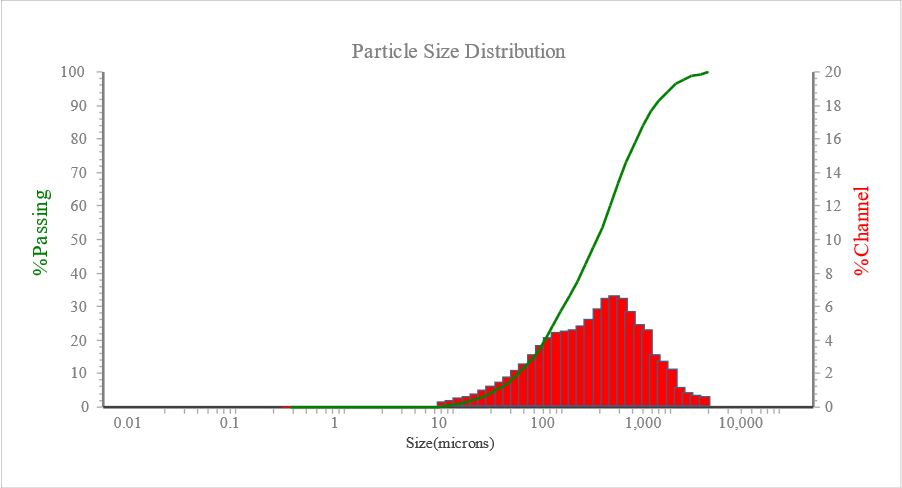


### S Fig 3. Particle size distribution of SCB 1.0% represented in microns (µm)


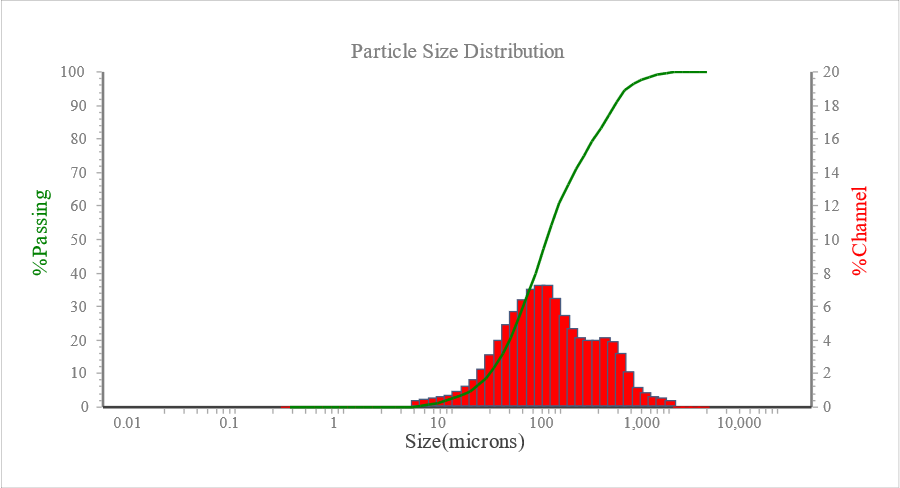


### S Fig 4. Particle size distribution of SCB 1.5% represented in microns (µm)


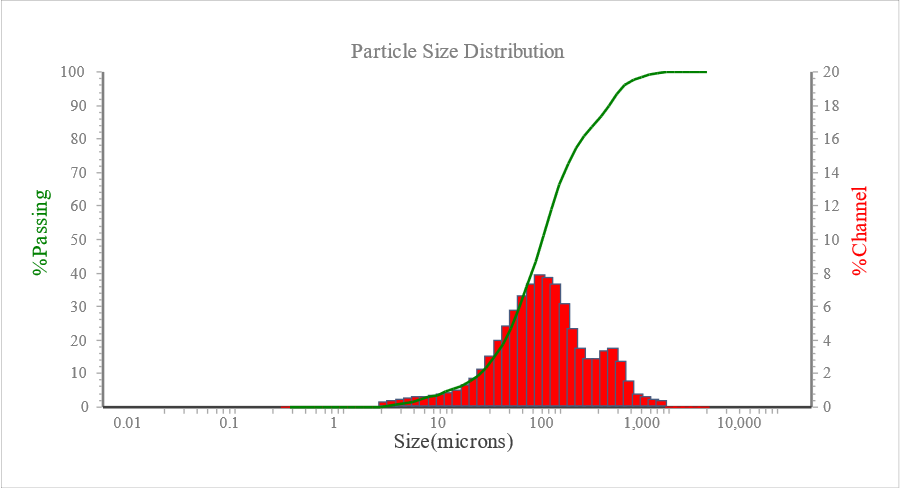


### S Fig 5. Particle size distribution of SCB 2.0% represented in microns (µm)


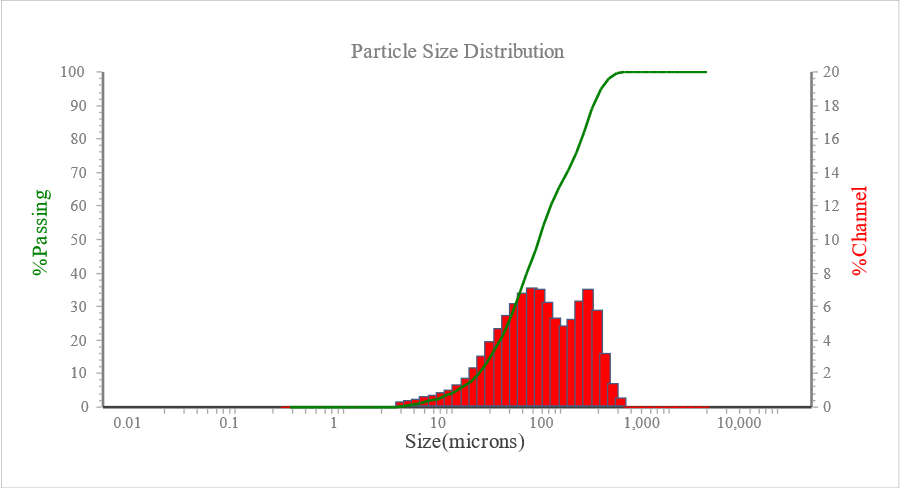


### S Fig 6. Particle size distribution of SCB 2.5% represented in microns (µm)

### S Table 1. Fatty acid profile of A2 treated with SCB 5-25% and MXL 5-25%

| Fatty Acid | Untreated (%) | SCB 5% | SCB 10% | SCB 15% | SCB 20% | SCB 25% | MXL 5% | MXL 10% | MXL 15% | MXL 20% | MXL 25% |
| --- | --- | --- | --- | --- | --- | --- | --- | --- | --- | --- | --- |
| Solvent (methanol) | 1.8 | 2.7 | 2.8 | 1.4 | 2.6 | 2.7 | 2.4 | 3.2 | 3.0 | 2.7 | 2.3 |
| Methyl butyrate (C4:0) | 9.6 | 4.8 | 5.8 | 5.4 | 5.5 | 6.2 | 7.0 | 6.7 | 5.7 | 4.9 | 5.2 |
| Myristoleic acid (C14:1) | 0.5 | 0.5 | 0.3 | 0.8 | 0.7 | 0.7 | 1.2 | 0.1 | 0.0 | 0.5 | 0.2 |
| Methyl heptadecanoate (C17:0) | 2.5 | 2.8 | 2.7 | 1.7 | 2.4 | 1.6 | 2.0 | 2.1 | 2.4 | 1.7 | 1.9 |
| Methyl stearate (C18:0) | 0.1 | 0.0 | 0.1 | 0.2 | 0.3 | 0.0 | 0.3 | 0.0 | 0.5 | 0.8 | 1.0 |
| Trans -9- elaidic acid (C18:1 t9) | 30.1 | 30.1 | 29.4 | 29.1 | 31.8 | 32.4 | 28.1 | 31.1 | 30.2 | 28.7 | 30.6 |
| Linolelaidic acid (C18:2 t9,12) | 0.9 | 1.5 | 0.7 | 0.9 | 1.2 | 1.4 | 1.4 | 1.6 | 1.5 | 1.1 | 1.0 |
| Gamma-linolenic acid (C18:3) | 47.8 | 50.2 | 50.1 | 51.4 | 48.9 | 48.3 | 50.8 | 48.2 | 50.1 | 52.2 | 50.8 |
| Methyl eicosanoate (C20:0) | 1.1 | 1.2 | 2.8 | 3.1 | 1.0 | 1.4 | 1.8 | 1.3 | 1.7 | 1.7 | 1.4 |
| Methyl heneicosanoate (C21:0) | 0.8 | 1.2 | 1.1 | 1.7 | 1.3 | 0.9 | 1.2 | 1.1 | 1.0 | 1.2 | 1.2 |
| Cis-11, 14-eicosadieniic acid (C20:2) | 3.3 | 4.2 | 3.4 | 3.9 | 3.5 | 4.0 | 3.5 | 4.1 | 3.3 | 3.3 | 3.6 |

### S Table 2. Fatty acid profile of D2 treated with SCB 5-25% and MXL 5-25%

| Fatty Acid | Untreated (%) | SCB 5% | SCB 10% | SCB 15% | SCB 20% | SCB 25% | MXL 5% | MXL 10% | MXL 15% | MXL 20% | MXL 25% |
| --- | --- | --- | --- | --- | --- | --- | --- | --- | --- | --- | --- |
| Solvent (methanol) | 14.2 | 12.1 | 13.5 | 12.6 | 9.8 | 12.0 | 9.2 | 10.2 | 15.3 | 14.7 | 10.9 |
| Myristoleic acid (C14:1) | 0.1 | 0.4 | 0.6 | 0.0 | 0.5 | 1.0 | 0.9 | 0.1 | 0.0 | 0.4 | 0.2 |
| Methyl palmitoleate (C16:1) | 1.3 | 0.9 | 1.9 | 1.0 | 2.3 | 2.0 | 1.7 | 0.8 | 2.3 | 2.5 | 2.2 |
| Cis-10 – heptadedecanoic acid (C17:1) | 39.2 | 38.7 | 38.3 | 39.4 | 40.2 | 40.8 | 42.1 | 39.0 | 39.6 | 38.8 | 40.2 |
| Trans -9- elaidic acid (C18:1 t9) | 18.7 | 18.7 | 18.3 | 18.1 | 19.9 | 19.5 | 18.2 | 19.9 | 17.0 | 17.5 | 18.4 |
| Cis-9- oleic acid (C18:1) | 0.4 | 1.0 | 0.7 | 1.1 | 0.2 | 1.4 | 0.4 | 0.8 | 1.1 | 0.9 | 0.9 |
| Linolelaidic acid (C18:2 t9,12) | 24.5 | 25.6 | 25.2 | 23.4 | 22.0 | 20.3 | 22.3 | 22.5 | 20.5 | 22.7 | 23.1 |
| Methyl heneicosanoate (C21:0) | 1.2 | 2.1 | 0.9 | 3.0 | 1.5 | 2.9 | 1.5 | 2.0 | 1.4 | 1.8 | 2.8 |

### S Table 3. Fatty acid profile of M2 treated with SCB 5-25% and MXL 5-25%

| Fatty Acid | Peak area (%) | SCB 5% | SCB 10% | SCB 15% | SCB 20% | SCB 25% | MXL 5% | MXL 10% | MXL 15% | MXL 20% | MXL 25% |
| --- | --- | --- | --- | --- | --- | --- | --- | --- | --- | --- | --- |
| Solvent (methanol) | 6.2 | 6.9 | 5.7 | 6.1 | 6.1 | 4.0 | 5.2 | 3.3 | 2.9 | 4.4 | 6.4 |
| Myristoleic acid (C14:1) | 0.5 | 0.3 | 0.5 | 0.2 | 0.3 | 0.4 | 0.5 | 0.4 | 0.5 | 0.1 | 0.5 |
| Methyl heptadecanoate (C17:0) | 3.1 | 1.8 | 1.4 | 1.6 | 2.4 | 3.0 | 2.2 | 2.8 | 2.2 | 2.9 | 2.5 |
| Methyl stearate (C18:0) | 0.1 | 0.3 | 0.3 | 0.8 | 0.4 | 0.5 | 0.7 | 0.8 | 0.3 | 0.9 | 0.2 |
| Trans -9- elaidic acid | 31.1 | 31.8 | 31.0 | 32.7 | 30.9 | 33.0 | 30.8 | 29.9 | 30.1 | 31.5 | 29.7 |
| Cis-9- oleic acid (C18:1) | 3.0 | 2.5 | 3.8 | 2.3 | 3.4 | 2.2 | 2.7 | 3.2 | 3.0 | 2.9 | 2.8 |
| Linolelaidic acid (C18:2 t9,12) | 0.6 | 0.3 | 0.5 | 0.3 | 0.4 | 0.6 | 0.5 | 0.4 | 0.4 | 0.6 | 0.6 |
| Gamma-linolenic acid (C18:2) | 26.6 | 26.1 | 25.7 | 26.6 | 24.4 | 26.6 | 25.2 | 26.9 | 26.6 | 24.1 | 26.5 |
| Methyl eicosanoate (C20:0) | 23.7 | 24.7 | 24.0 | 23.5 | 23.2 | 23.7 | 25.9 | 25.8 | 25.9 | 25.6 | 25.2 |
| Methyl heneicosanoate (C21:0) | 0.7 | 1.3 | 2.6 | 1.4 | 2.7 | 1.5 | 2.5 | 1.9 | 2.4 | 1.7 | 2.6 |
| Cis-11, 14-eicosadieniic acid (C20:2) | 2.7 | 3.5 | 3.6 | 3.4 | 3.3 | 2.1 | 2.3 | 3.9 | 3.8 | 3.4 | 2.3 |

### S Table 4. Fatty acid profile of N2 treated with SCB 5-25% and MXL 5-25%

| Fatty Acid | Untreated (%) | SCB 5% | SCB 10% | SCB 15% | SCB 20% | SCB 25% | MXL 5% | MXL 10% | MXL 15% | MXL 20% | MXL 25% |
| --- | --- | --- | --- | --- | --- | --- | --- | --- | --- | --- | --- |
| Methyl butyrate (C4:00) | 1.5 | 1.0 | 0.9 | 1.0 | 0.2 | 0.4 | 1.8 | 0.5 | 1.4 | 1.0 | 1.0 |
| Methyl hexanoate (C6:00) | 4.5 | 1.3 | 2.7 | 1.9 | 2.5 | 1.5 | 1.6 | 2.0 | 2.1 | 1.5 | 2.7 |
| Methyl pentadecanoic acid (C15:0) | 0.3 | 0.2 | 0.5 | 0.4 | 0.2 | 0.0 | 0.2 | 0.0 | 0.1 | 0.4 | 0.4 |
| Cis-10 – heptadedecanoic acid (C17:1) | 2.0 | 4.0 | 3.8 | 2.2 | 2.1 | 2.7 | 3.4 | 2.3 | 2.2 | 2.8 | 3.4 |
| Methyl stearate (C18:0) | 0.3 | 0.3 | 0.4 | 0.5 | 0.4 | 1.0 | 0.2 | 0.6 | 0.3 | 0.2 | 0.8 |
| Trans -9- elaidic acid (C18:1 t9) | 32.6 | 31.8 | 32.9 | 33.5 | 32.6 | 33.4 | 31.3 | 32.4 | 31.5 | 32.5 | 31.7 |
| Linolelaidic acid (C18:2 t9,12) | 0.8 | 1.2 | 1.6 | 1.2 | 0.9 | 1.5 | 0.9 | 1.5 | 1.4 | 1.1 | 1.5 |
| Methyl heneicosanoate (C21:0) | 53.6 | 55.5 | 55.7 | 54.6 | 54.3 | 54.9 | 54.8 | 55.4 | 54.0 | 54.9 | 54.0 |
| Methyl behenate (C22:0) | 3.8 | 3.0 | 3.7 | 3.5 | 3.5 | 3.9 | 3.4 | 2.7 | 3.8 | 3.2 | 2.2 |

### S Table 5. Fatty acid profile of Y1 treated with SCB 5-25% and MXL 5-25%

| Fatty Acid | Untreated (%) | SCB 5% | SCB 10% | SCB 15% | SCB 20% | SCB 25% | MXL 5% | MXL 10% | MXL 15% | MXL 20% | MXL 25% |
| --- | --- | --- | --- | --- | --- | --- | --- | --- | --- | --- | --- |
| Solvent (methanol) | 5.5 | 3.9 | 2.7 | 4.3 | 6.1 | 4.3 | 4.6 | 5.4 | 6.2 | 6.8 | 4.8 |
| Methyl decanoate (C10:0) | 0.1 | 0.3 | 0.1 | 0.2 | 0.0 | 0.8 | 0.9 | 0.0 | 0.3 | 0.7 | 0.0 |
| Myristoleic acid (C14:1) | 0.5 | 1.6 | 1.4 | 0.7 | 1.2 | 1.2 | 1.0 | 0.4 | 1.4 | 1.0 | 1.2 |
| Methyl heptadecanoate (C17:0) | 2.9 | 2.7 | 3.9 | 3.3 | 2.9 | 3.0 | 2.4 | 3.8 | 3.1 | 2.2 | 2.3 |
| Methyl stearate (C18:0) | 0.4 | 1.7 | 1.8 | 1.4 | 1.9 | 2.3 | 1.2 | 0.9 | 2.0 | 1.0 | 1.0 |
| Trans -9- elaidic acid (C18:1 t9) | 34.8 | 34.4 | 33.8 | 34.2 | 33.5 | 35.6 | 34.5 | 33.5 | 32.4 | 34.3 | 34.7 |
| Linolelaidic acid (C18:2 t9,12) | 0.8 | 1.7 | 2.5 | 2.6 | 2.0 | 1.4 | 1.0 | 1.5 | 1.6 | 2.4 | 1.0 |
| Methyl eicosanoate (Arachidic acid) | 48.6 | 49.2 | 48.3 | 46.2 | 49.2 | 46.2 | 47.2 | 50.6 | 48.5 | 47.5 | 50.3 |
| Methyl heneicosanoate (C21:0) | 0.9 | 1.4 | 1.2 | 0.9 | 1.2 | 1.6 | 1.5 | 1.7 | 1.5 | 1.4 | 1.1 |
| Cis-11, 14-eicosadieniic acid (C20:2) | 1.4 | 1.9 | 1.8 | 2.1 | 1.3 | 2.3 | 2.5 | 1.1 | 1.9 | 1.7 | 2.6 |
